# Supplementary material for: Extending the spectrum of DNA sequences retrieved from ancient bones and teeth
Source: HighWire-hosted journal article supplement (doi:10.1101/gr.219675.116), 2017-04-13
Supplement: Supplemental_Table_S3.xlsx [file Supplemental_Table_S3.xlsx]

## Sheet: single-stranded lib prep
Table S3: Summary of sequencing results obtained from single-stranded library prepartion.
DNA extraction and library preparation														Shotgun sequencing
Experiment set *	Sample	Extraction method	Fraction of extraction control fragments recovered	Volume of extract used for library preparation[µl]	Library ID	qPCR replicate 1	qPCR replicate 2	Average № molecules in library	Recovery rate (output/ input)	qPCR replicate spike-in 1	qPCR replicate spike-in 2	Average № spike-in molecules in library	Conversion rate of oligonucleotide spike-in †	Reference genome	Sequences	Overlap-merged sequences	Overlap-merged sequences ≥35bp	Aligned sequences ≥35bp	Percentage of sequences aligned (≥35bp)	Average length of all sequences	Average length of aligned sequences ≥35bp	Total sequence content in library	Informative sequence content in library	5' C to T substitution frequency	3' C to T substitution frequency	λ (all sequences)	λ (aligned sequences ≥35)
1	1: Cave bear (Gamsulzen cave)	Buffer Exchange	0.491071	1	R1406	253800	288100	677375000		90.32	86.46	220975	0.933812	ursMar0	1660462	1623852	187123	8504	4.5446	20.7985	49.3962	1.37778e+10	1.71363e+08	33.2	22.6	0.0254	0.03
				3	R1407	792000	957200	2186500000	1.07597	103.5	98.72	252775	1.0682	ursMar0	1257407	1227363	164203	7698	4.6881	21.4396	50.483	4.57576e+10	6.75766e+08	35.8	24.6	0.0242	0.0269
				9	R1408	1821000	2260000	5101250000	0.836768	74.58	66.8	176725	0.746817	ursMar0	1464160	1406676	183622	8279	4.50872	21.2029	52.4896	1.03915e+11	1.51405e+09	33.7	17	0.0206	0.0251
				27	R1409	3250000	2763000	7516250000	0.410968	39.96	44.87	106038	0.448101	ursMar0	1578325	1535541	176812	7545	4.26724	20.3273	54.6372	1.48644e+11	1.96314e+09	32.8	13	0.0173	0.0175
		Method A	0.784722	1	R1410	90350	100400	238437500		125.6	91.62	271525	1.14743	ursMar0	1212968	1159620	383227	16073	4.19412	30.4402	56.3633	6.93885e+09	1.78081e+08	30.3	22	0.0169	0.0219
				3	R1411	255000	276000	663750000	0.927916	134.1	124	322625	1.36337	ursMar0	1305293	1247136	716654	30397	4.24152	43.6119	56.745	2.76577e+10	8.77111e+08	31.8	22.4	0.0162	0.0187
				9	R1412	913500	771900	2106750000	0.981739	145.8	94.24	300050	1.26797	ursMar0	1476144	1403449	949832	40432	4.25675	49.0946	57.0385	9.83364e+10	3.29138e+09	31.6	22.8	0.016	0.0203
				27	R1413	3046000	2875000	7401250000	1.14965	133.4	109.1	303125	1.28097	ursMar0	1797307	1707774	1223820	51160	4.18035	51.2745	57.0176	3.60591e+11	1.20122e+10	31.7	22.5	0.0157	0.0185
		Method B	0.978571	1	R1414	243200	302800	682500000		116.2	93.74	262425	1.10897	ursMar0	1561723	1517364	499395	22311	4.46761	31.3803	49.9579	2.08087e+10	4.87104e+08	33.4	22.7	0.0252	0.0278
				3	R1415	670100	824500	1868250000	0.912454	84.22	87.05	214088	0.904707	ursMar0	1473468	1425842	618887	27759	4.48531	36.8967	51.9123	6.67041e+10	1.82712e+09	33.1	20.6	0.0217	0.0248
				9	R1416	871700	1084000	2444625000	0.397985	43.7	39.6	104125	0.440019	ursMar0	1501940	1451976	646840	27609	4.26829	38.8594	54.4679	9.18364e+10	2.44766e+09	33.5	14.3	0.0175	0.0211
				27	R1417	1630000	1749000	4223750000	0.229209	18.93	15.37	42875	0.181184	ursMar0	1535672	1488952	636857	27630	4.33849	37.906	54.9124	1.55234e+11	4.17303e+09	34.5	11.9	0.0171	0.0202
		Method C	1.18452	1	R1418	270200	321000	739000000		123.3	113.3	295750	1.2498	ursMar0	1732289	1683930	618342	27727	4.48409	32.7209	50.6867	2.35057e+10	5.99544e+08	34.6	23.4	0.025	0.0291
				3	R1419	567900	524800	1365875000	0.616092	111.8	80.08	239850	1.01358	ursMar0	1668446	1616609	809422	36822	4.54917	39.8216	53.0999	5.27014e+10	1.60066e+09	33.6	19.6	0.0208	0.0237
				9	R1420	1015000	990600	2507000000	0.376936	56.78	62.16	148675	0.628282	ursMar0	1752990	1691573	837196	35492	4.23939	40.9377	54.9033	9.90352e+10	2.78679e+09	34.1	14.3	0.0175	0.0199
				27	R1421	1615000	1449000	3830000000	0.191951	23.39	18.34	52162.5	0.220432	ursMar0	1729096	1676937	796350	32184	4.04144	40.0834	55.2397	1.48889e+11	3.93796e+09	33.4	10.5	0.0176	0.0222
	2: Cave bear (Sima de los Huesos cave) ‡	Buffer Exchange	0.493056	1	R1422	208300	206900	519000000		107.3	95.24	253175	1.06989	ursMar0	1940230	1893979	174673	538		19.6026		9.93123e+09				0.0226
				3	R1423	517000	639600	1445750000	0.928548	110.3	131.1	301750	1.27516	ursMar0	1644378	1605569	176331	216		20.8647		2.94532e+10				0.0221
				9	R1424	1391000	1925000	4145000000	0.88739	101.6	109.7	264125	1.11616	ursMar0	1864990	1815093	214097	136		21.3448		8.6107e+10				0.0223
				27	R1425	5259000	5775000	13792500000	0.984265	94.58	99.99	243212	1.02779	ursMar0	1721826	1677613	199541	85		21.1152		2.83753e+11				0.0222
		Method A	0.684127	1	R1430	71610	82390	192500000		69.41	57.77	158975	0.671808	ursMar0	1005074	962609	326799	783		31.0507		5.72471e+09				0.0183
				3	R1431	290300	251500	677250000	1.17273	81.55	62.25	179750	0.759601	ursMar0	572868	481709	263168	243		42.1522		2.40049e+10				0.0185
				9	R1432	690500	741900	1790500000	1.03348	74.31	66.04	175438	0.741377	ursMar0	1098634	1048967	632246	365		44.9036		7.67651e+10				0.0183
				27	R1433	1922000	1866000	4735000000	0.911015	69.55	52.34	152362	0.643865	ursMar0	774872	745564	475075	240		46.3928		2.11361e+11				0.0188
		Method B	0.843651	1	R1434	202400		506000000		77.6		194000	0.819819	ursMar0	874869	847235	192530	298		28.0646		1.37521e+10				0.0239
				3	R1435	787900		1969750000	1.2976	85.16		212900	0.899688	ursMar0	931695	902223	232730	179		30.1172		5.74467e+10				0.0233
				9	R1436	3015000		7537500000	1.65514	127.3		318250	1.34488	ursMar0	1002163	969990	269688	141		31.2014		2.2763e+11				0.0229
				27	R1437	6469000		16172500000	1.18376	83.36		208400	0.880672	ursMar0	1095645	1063639	319048	137		32.1481		5.04727e+11				0.0227
		Method C	0.929167	1	R1438	176300		440750000		70.87		177175	0.748719	ursMar0	751323	725073	171948	332		27.7455		1.18016e+10				0.0234
				3	R1439	610300		1525750000	1.1539	96.63		241575	1.02087	ursMar0	832759	799398	246205	203		31.9709		4.68255e+10				0.023
				9	R1440	1578000		3945000000	0.994517	72.65		181625	0.767524	ursMar0	824676	799775	270070	143		33.6657		1.28801e+11				0.0225
				27	R1441	6031000		15077500000	1.26699	78.03		195075	0.824362	ursMar0	921774	894370	312814	149		34.2248		5.00683e+11				0.0227
	3: Cave bear (Vindija cave)	Buffer Exchange	0.526786	1	R1442	174500		436250000		77.93		194825	0.823306	ursMar0	1446585	1407954	104379	830	0.795179	18.5958	45.1964	7.89576e+09	1.13129e+07	48.6	30.8	0.0238	0.0416
				3	R1443	597800		1494500000	1.14193	78.3		195750	0.827215	ursMar0	860281	838813	69104	425	0.615015	19.2142	45.2412	2.7999e+10	3.34025e+07	39.1	34.7	0.0232	0.0439
				9	R1444	2054000		5135000000	1.30786	102.5		256250	1.08288	ursMar0	1615145	1575583	141103	776	0.549953	19.5886	44.4021	9.81238e+10	1.09545e+08	51	31.8	0.0218	0.0383
				27	R1445	6190000		15475000000	1.31381	80.09		200225	0.846125	ursMar0	949389	924289	83253	377	0.452837	19.3746	46.5782	2.91896e+11	2.86227e+08	39.6	33.8	0.022	0.0321
		Method A	0.90754	1	R1446	86220		215550000		83.92		209800	0.886588	ursMar0	813790	769740	202256	1297	0.641267	27.8814	46.5204	5.68453e+09	1.59816e+07	25.8	19.2	0.0158	0.0416
				3	R1447	228800		572000000	0.884559	112.1		280250	1.1843	ursMar0	787621	734525	350052	1603	0.457932	39.6674	47.6592	2.11602e+10	5.54829e+07	39	30.9	0.016	0.0377
				9	R1448	686400		1716000000	0.884559	81.13		202825	0.857113	ursMar0	891246	827473	489086	1954	0.399521	46.0666	48.9392	7.33938e+10	1.8412e+08	40.9	35.1	0.0161	0.038
				27	R1449	1344000		3360000000	0.577334	81.63		204075	0.862395	ursMar0	248637	235729	147942	676	0.456936	46.7983	48.9143	1.49079e+11	4.46844e+08	41.4	27.6	0.0182	0.0268
2		Method B	0.819643	1	R1454	191000		477500000		97.5		243750	1.35928	ursMar0	1321120	1271282	291919	1788	0.612499	28.279	45.2689	1.29938e+10	2.92549e+07	45.9	32.6	0.0213	0.0443
				3	R1455	583000		1457500000	1.01745	99.5		248750	1.38716	ursMar0	1728458	1664537	442297	2309	0.522047	30.7872	45.8334	4.3213e+10	8.92392e+07	45.7	32.4	0.0216	0.0376
				9	R1456	1580000		3950000000	0.919139	88		220000	1.22684	ursMar0	761069	732682	204109	904	0.442901	31.5796	45.1115	1.20087e+11	2.11655e+08	50	31.4	0.0215	0.0368
				27	R1457	4550000		11375000000	0.882296	88.9		222250	1.23938	ursMar0	795792	767038	236262	1045	0.442306	32.8349	45.3011	3.60002e+11	6.76671e+08	47	30.5	0.0214	0.0501
		Method C	0.98254	1	R1458	197000		492500000		89.6		224000	1.24914	ursMar0	735988	709535	184575	976	0.528782	29.5751	45.5128	1.40422e+10	2.97248e+07	42.8	30.7	0.0216	0.0418
				3	R1459	553000		1382500000	0.935702	123		307500	1.71478	ursMar0	738775	713318	217702	1076	0.494254	32.6226	44.8802	4.35467e+10	9.03692e+07	48.2	31.6	0.0212	0.048
				9	R1460	2040000		5100000000	1.15059	113		282500	1.57537	ursMar0	872559	838236	275683	1257	0.455958	33.9593	45.4905	1.6638e+11	3.34219e+08	45	36.7	0.022	0.0334
				27	R1461	4810000		12025000000	0.904305	96.6		241500	1.34673	ursMar0	805639	773242	272096	1233	0.453149	35.0438	46.0284	4.04456e+11	8.47097e+08	45.8	32.5	0.0212	0.0438
	4: Brown bear tooth (Denisova cave)	Buffer Exchange	0.535913	1	R1462	281000		702500000		94.6		236500	1.31885	ursMar0	2121572	2074320	211569	34705	16.4036	20.4184	47.8958	1.40244e+10	5.50399e+08	41.9	31.3	0.0324	0.0316
				3	R1463	909000		2272500000	1.07829	95.7		239250	1.33419	ursMar0	1510658	1478921	162704	27035	16.6161	20.8159	48.4046	4.63104e+10	1.96857e+09	40.4	31.1	0.0312	0.031
				9	R1464	2170000		5425000000	0.858047	93		232500	1.29654	ursMar0	1478956	1443833	157891	26573	16.83	20.5398	49.5351	1.08782e+11	4.82834e+09	42.5	28.2	0.0288	0.0295
				27	R1465	5070000		12675000000	0.668248	67.4		168500	0.939646	ursMar0	1729233	1695457	166827	26430	15.8428	19.8305	51.2468	2.46442e+11	9.92792e+09	41.4	23.1	0.0252	0.0248
		Method A	0.758333	1	R1466	64000		160000000		83		207500	1.15713	ursMar0	1485847	1436501	448155	64679	14.4323	28.4489	53.7217	4.40066e+09	3.74161e+08	41.1	30.8	0.0227	0.0225
				3	R1467	166000		415000000	0.864583	90.2		225500	1.25751	ursMar0	1735649	1676197	784896	117061	14.9142	36.2256	53.4997	1.45187e+10	1.49744e+09	39.8	30.2	0.0233	0.0225
				9	R1468	559000		1397500000	0.970486	106		265000	1.47778	ursMar0	1577611	1537009	874629	133166	15.2254	41.2113	53.9041	5.61106e+10	6.35868e+09	40.3	30.9	0.0226	0.0216
				27	R1469	1310000		3275000000	0.758102	74.8		187000	1.04281	ursMar0	1419499	1379758	850049	130393	15.3395	43.4277	54.004	1.38244e+11	1.62464e+10	40.5	30.1	0.023	0.0226
		Method B	0.8	1	R1470	281000	259000	675000000		91.8	79.47	214088	1.19387	ursMar0	1321694	1287107	337985	56014	16.5729	28.6803	48.347	1.88526e+10	1.38305e+09	41.1	30.9	0.0315	0.0319
				3	R1471	786000	732000	1897500000	0.937037	79.8	82.16	202450	1.12897	ursMar0	1543420	1512537	473601	78217	16.5154	31.161	48.8182	5.79449e+10	4.6944e+09	41.6	29.7	0.0314	0.0309
				9	R1472	1440000	1320000	3450000000	0.567901	72.9	45.69	148238	0.826651	ursMar0	1709446	1668625	547903	90496	16.5168	32.2852	50.7614	1.08724e+11	9.27099e+09	41.6	24.3	0.0261	0.0267
				27	R1473	2460000	1940000	5500000000	0.301783	39.9	22.81	78387.5	0.43713	ursMar0	1712029	1672055	517049	81468	15.7563	31.8984	51.9815	1.71345e+11	1.36046e+10	42.1	18	0.0235	0.0232
		Method C	0.817262	1	R1478	248000	226000	592500000		69.7	50.76	150575	0.839686	ursMar0	1262643	1225450	356880	58238	16.3187	29.5282	48.4698	1.69801e+10	1.3246e+09	40	31.6	0.0317	0.0326
				3	R1479	685000	711000	1745000000	0.981716	59.4	50.65	137562	0.767122	ursMar0	1085348	1058624	373824	63253	16.9205	32.5814	49.0278	5.54547e+10	4.98597e+09	41.8	30.2	0.0305	0.031
				9	R1480	1290000	1210000	3125000000	0.586029	47	47.42	118025	0.65817	ursMar0	1068355	1041886	384024	66917	17.4252	33.7985	50.8812	1.03003e+11	9.95928e+09	41.5	24.5	0.026	0.0257
				27	R1481	1790000	1940000	4662500000	0.291452	20.2	21.49	52112.5	0.290607	ursMar0	1289426	1258223	451540	74362	16.4685	33.9205	52.3166	1.54327e+11	1.40674e+10	42.4	19.4	0.0235	0.0225
	5: Yak (Denisova cave)	Buffer Exchange	0.486706	1	R1482	2590000	2260000	6062500000		58.1	52.44	138175	0.770537	bosTau6	1130360	1105759	82740	398	0.481025	19.6254	45.4211	1.16389e+11	9.69561e+07	29.9	23.9	0.0297	0.0328
				3	R1483	7780000	7990000	19712500000	1.08385	50.8	58.35	136438	0.760848	bosTau6	1239528	1212436	94006	415	0.441461	19.6645	45.6699	3.79164e+11	3.01414e+08	41.9	37.7	0.0279	0.0381
				9	R1484	29100000	25800000	68625000000	1.25773	77.9	68.53	183038	1.02071	bosTau6	1161160	1131926	92281	348	0.377109	19.4657	46.1494	1.3022e+12	9.49152e+08	38.8	25.8	0.0283	0.0342
				27	R1485	44600000	38900000	104375000000	0.637648	38.2	37.83	95037.5	0.52998	bosTau6	1493631	1458152	123356	451	0.365608	19.4673	48.8938	1.98364e+12	1.54093e+09	33.9	23.5	0.0221	0.0378
		Method A	0.799405	1	R1486	387000	400000	983750000		60.8	54.96	144700	0.806924	bosTau6	1521523	1474820	879893	3768	0.428234	43.4749	49.6987	4.14557e+10	1.21077e+08	40.7	30.2	0.0187	0.0279
				3	R1487	1340000	1410000	3437500000	1.16476	90.5	69.58	200100	1.11586	bosTau6	1297838	1254410	834548	3080	0.369062	47.0965	49.6948	1.56477e+11	4.054e+08	37.6	30.8	0.0182	0.0319
				9	R1488	3770000	3970000	9675000000	1.09276	75.9	67.54	179300	0.999872	bosTau6	1274794	1235595	854116	3289	0.385077	48.299	50.1111	4.52924e+11	1.25086e+09	40.6	28.3	0.0185	0.0272
				27	R1489	10500000	10200000	25875000000	0.974163	73.3	56.19	161862	0.902631	bosTau6	1319163	1276978	904288	3538	0.391247	49.0116	50.4561	1.22762e+12	3.50149e+09	40.6	28.4	0.0186	0.0304
		Method B	0.917857	1	R1490	2580000	2580000	6450000000		69.6	62.48	165100	0.920685	bosTau6	1234820	1205881	307506	1301	0.423081	29.9236	45.1845	1.88484e+11	3.0706e+08	41.8	30.5	0.0295	0.0326
				3	R1491	6840000	6490000	16662500000	0.861111	74.1	76.03	187662	1.04651	bosTau6	1356473	1327193	365373	1540	0.421487	30.6271	45.9961	4.99308e+11	8.70103e+08	45.9	30.3	0.0291	0.0395
				9	R1492	16700000	19000000	44625000000	0.768734	54	51.06	131325	0.732338	bosTau6	1392523	1361814	396639	1451	0.365824	31.4309	47.4711	1.37167e+12	2.20736e+09	44.6	22.7	0.025	0.0404
				27	R1493	20200000	17600000	47250000000	0.271318	23.3	12.64	44925	0.250526	bosTau6	1347032	1313598	383422	1185	0.309059	31.5069	48.6287	1.45175e+12	2.02132e+09	44.5	11.7	0.0216	0.0312
		Method C	0.966468	1	R1494	1870000	1420000	4112500000		72.8	116.2	236250	1.31746	bosTau6	1085896	1061731	338765	1413	0.417103	32.2628	46.0969	1.29728e+11	2.46679e+08	41.4	32.9	0.0285	0.0322
				3	R1495	6470000	5760000	15287500000	1.23911	59.3	79.2	173125	0.965437	bosTau6	1441258	1410268	482899	2069	0.428454	33.1452	46.2749	4.95812e+11	1.01555e+09	40.6	30.6	0.0282	0.0309
				9	R1496	12500000	12000000	30625000000	0.827423	59.4	61.11	150638	0.840035	bosTau6	1175530	1145897	424944	1605	0.377697	34.4477	47.2696	1.02837e+12	1.97651e+09	41.7	26.2	0.0255	0.0342
				27	R1497	17400000	16300000	42125000000	0.379376	19.8	16.15	44937.5	0.250595	bosTau6	1250514	1217926	467152	1601	0.342715	35.3383	48.8391	1.44983e+12	2.63396e+09	38.9	21.9	0.0215	0.0358
3	6: Bison, permafrost (Yukon)	Buffer Exchange	0.467262	1	R9002	306400		766000000		112	124.8	296000	1.34469	bosTau6	1781951	1748485	438946	178585	40.685	28.7209	47.2797	2.1587e+10	3.62955e+09	22.5	18.8	0.0242	0.0331
				3	R9003	1007000		2517500000	1.09552	113	128.6	302000	1.37195	bosTau6	1735478	1699047	502548	208863	41.5608	30.896	47.9439	7.6148e+10	1.4526e+10	22.6	19.2	0.0229	0.0317
				9	R9004	2364000		5910000000	0.857267	91	107.2	247750	1.1255	bosTau6	833266	817231	231378	91204	39.4177	30.3095	48.6084	1.75682e+11	3.14434e+10	21.8	14.9	0.0206	0.03
				27	R9005	3892000		9730000000	0.470457	55.7	51.6	134125	0.609313	bosTau6	869526	853002	240984	89518	37.1469	30.8366	50.3425	2.94338e+11	5.04284e+10	21.8	12	0.0163	0.0252
		Method A	0.902778	1	R9006	117700		294250000		116	108.6	280750	1.27541	bosTau6	735196	707515	318714	123112	38.6277	38.7356	53.0214	1.09688e+10	2.61255e+09	20.3	17.6	0.0142	0.0234
				3	R9007	366000		915000000	1.03653	115	115.8	288500	1.31062	bosTau6	708343	677712	423369	170501	40.2724	48.8414	53.2838	4.27574e+10	1.17354e+10	20.8	18.3	0.0136	0.0231
				9	R9008	1309000		3272500000	1.23572	120	120.8	301000	1.3674	bosTau6	934890	893608	622550	254990	40.959	52.7042	53.2826	1.64859e+11	4.75584e+10	20.8	18.5	0.0136	0.0232
				27	R9009	2769000		6922500000	0.87133	96.9	116.8	267125	1.21352	bosTau6	750992	715844	535248	216223	40.3968	55.8066	53.5528	3.68241e+11	1.06736e+11	20.7	17.5	0.013	0.0229
		Method B	0.857738	1	R9010	408900		1022250000		103	122.6	282000	1.28109	bosTau6	2136395	2090728	939973	385948	41.0595	36.6045	47.075	3.66191e+10	8.69351e+09	22.1	18.7	0.0253	0.0344
				3	R9011	1338000		3345000000	1.09073	94.8	112.6	259250	1.17774	bosTau6	1462560	1421687	772591	309042	40.0007	41.7399	48.9182	1.35718e+11	3.45756e+10	22.1	16.8	0.0215	0.0302
				9	R9012	2023000		5057500000	0.549713	45.7	57.4	128875	0.585463	bosTau6	1961523	1910367	1070345	400732	37.4395	43.8519	50.5575	2.15997e+11	5.22375e+10	21.9	12.3	0.0164	0.0255
				27	R9013	3495000		8737500000	0.316567	25.1	27	65125	0.295855	bosTau6	1633468	1578206	912951	322287	35.3017	46.0509	52.059	3.88757e+11	8.97461e+10	21.4	9.5	0.0143	0.0228
		Method C	0.80377	1	R9014	355400		888500000		110	108.8	273500	1.24248	bosTau6	1863621	1819874	927899	359354	38.7277	39.3115	48.5117	3.41083e+10	8.31129e+09	20.8	18.5	0.023	0.0316
				3	R9015	1159000		2897500000	1.08704		116.4	291000	1.32198	bosTau6	1764067	1716521	1022494	388011	37.9475	43.6087	49.4611	1.22951e+11	3.15222e+10	20.9	17.1	0.0215	0.0302
				9	R9016	2172000		5430000000	0.679047		72	180000	0.817717	bosTau6	1748389	1699985	1047178	371876	35.5122	46.2266	51.2821	2.44061e+11	5.92278e+10	20.4	12.7	0.0158	0.0246
				27	R9017	2561000		6402500000	0.266888	34.7	27.2	77375	0.351505	bosTau6	1517347	1475563	935328	324256	34.6676	47.6776	52.2856	2.9685e+11	7.15377e+10	20.8	10.2	0.0144	0.0225
	7: Beluga whale, underwater (North Sea)	Buffer Exchange	0.491667	1	R9018	449000	372000	1026250000		112	106.6	273250	1.24134	turTru1.75	1855382	1814793	425927	46222	10.8521	28.3862	45.5224	2.84941e+10	1.16384e+09	33.2	26.1	0.0229	0.0367
				3	R9019	1340000	1310000	3312500000	1.07592	117	125.6	303250	1.37763	turTru1.75	2162044	2111739	550388	59290	10.7724	29.6226	45.6808	9.58417e+10	4.14961e+09	32.9	26.8	0.0228	0.0369
				9	R9020	4190000	3030000	9025000000	0.977128	77.7	114	239625	1.08859	turTru1.75	2137917	2080439	597863	62940	10.5275	30.9275	46.6069	2.71616e+11	1.23832e+10	32.8	24.8	0.0214	0.036
				27	R9021	7550000	7020000	18212500000	0.657283	89.1	93.6	228375	1.03748	turTru1.75	1959155	1900897	563805	53370	9.46604	31.5991	48.0553	5.58385e+11	2.38418e+10	33.5	20.1	0.0176	0.0322
		Method A	0.756944	1	R9024	218000	209000	533750000		92.9	125.2	272625	1.2385	turTru1.75	1701739	1611977	908561	62636	6.89398	45.0918	50.6862	2.27982e+10	9.95769e+08	30.4	26	0.0129	0.0274
				3	R9025	552000	706000	1572500000	0.982045	104	112.8	271000	1.23112	turTru1.75	1710483	1609905	1066425	74634	6.99852	50.5876	50.7563	7.48715e+10	3.48256e+09	31	25.6	0.0128	0.027
				9	R9026	2010000	2360000	5462500000	1.13713	93.4	88.2	227000	1.03123	turTru1.75	1090483	999154	712108	48566	6.82003	54.4824	51.6737	2.72685e+11	1.25711e+10	30.9	26.1	0.0115	0.0239
				27	R9027	3840000	4380000	10275000000	0.712985	77.7	93.8	214375	0.973878	turTru1.75	913837	762290	579976	37767	6.51182	57.88	52.8763	4.96091e+11	2.24536e+10	29	25.4	0.0113	0.0249
		Method B	0.943056	1	R9028	315000	353000	835000000		85.2	86.8	215000	0.976718	turTru1.75	1329269	1274498	599288	62868	10.4904	39.0546	46.4732	3.12669e+10	1.83529e+09	32.6	27.7	0.0216	0.0358
				3	R9029	1330000	906000	2795000000	1.11577	74.4	78.8	191500	0.86996	turTru1.75	1121544	1071512	564053	59190	10.4937	41.8008	46.6481	1.11621e+11	6.88094e+09	31.8	26.4	0.0211	0.0368
				9	R9030	4170000	2480000	8312500000	1.10612	83.3	77.4	200875	0.91255	turTru1.75	989369	940736	520187	50003	9.6125	43.449	47.8183	3.43416e+11	2.00892e+10	31.3	23.4	0.0198	0.0332
				27	R9031	5700000	5980000	14600000000	0.647594	37.7	42.4	100125	0.454855	turTru1.75	1050359	994034	574171	49129	8.55651	45.7902	49.3425	6.32687e+11	3.36956e+10	31.4	16.9	0.0149	0.0281
		Method C	0.82619	1	R9032	402000	525000	1158750000		86	84	212500	0.965361	turTru1.75	956068	910055	479942	48562	10.1183	41.5136	47.0729	4.57888e+10	2.77056e+09	32.2	26.8	0.0213	0.035
				3	R9033	1330000		3325000000	0.95649	97.1	85.4	228125	1.03634	turTru1.75	1281120	1221950	695769	68894	9.90185	43.5714	47.1503	1.38184e+11	8.43078e+09	32.1	27.1	0.0207	0.0342
				9	R9034	4960000		12400000000	1.18902	98.1		245250	1.11414	turTru1.75	945354	897572	532429	50285	9.44445	44.645	47.6103	5.25617e+11	3.14027e+10	31.3	24.6	0.0204	0.0341
				27	R9035	7240000		18100000000	0.578529	47.6		119000	0.540602	turTru1.75	934999	875227	547210	46389	8.47737	47.6207	49.4067	8.06834e+11	4.43678e+10	31.2	19.4	0.0162	0.0287
1	8: extraction blank	Buffer Exchange	0.453175	1	R1426	26490	29730	70275000		101.4	106.9	260375		hg19	169252	163646	7549	200	2.64936	15.3661	48.145	1.04409e+09	3.99805e+06	0	0
				27	R1427	23860	22190	57562500		117	110.1	283875		hg19	123689	118562	6447	209	3.24182	15.783	46.3349	8.70853e+08	4.50675e+06	7.1	0
		Method A	0.86627	1	R1450	26230		65575000		69.28		173200		hg19	114462	109871	6045	172	2.84533	16.1426	51.8613	1.0161e+09	5.11033e+06	0	0
				27	R1451	39520		98800000		83.9		209750		hg19	102905	99004	13547	457	3.37344	20.4778	57.321	1.94651e+09	2.51507e+07	1.2	2.1
2		Method B	0.669246	1	R1474	21500		53750000		76.4		191000		hg19	221343	213052	12641	381	3.014	15.7658	45.706	8.15669e+08	4.22874e+06	0	0
				27	R1475	32600		81500000		76.1		190250		hg19	207626	199567	22422	437	1.94898	19.0423	47.4977	1.49171e+09	8.14761e+06	0	1.9
		Method C	0.63254	1	R1498	21200	18200	49250000		51.7	56.3	135000		hg19	227457	217769	10956	308	2.81124	15.5457	46.7955	7.33018e+08	3.12077e+06	0	0
				27	R1499	29800	30300	75125000		72.4	73.55	182437		hg19	233250	223729	18961	402	2.12014	17.6684	46.8831	1.27316e+09	6.07023e+06	0	0
1	library blank				R1428	27160	30090	71562500		99.26	101.7	251200		hg19	341671	328211	15158	493	3.25241	15.5309	46.5862	1.06765e+09	4.81041e+06	0	0
					R1452	25210		63025000		96.57		241425		hg19	113520	108419	4656	179	3.8445	15.4847	48.2778	9.32073e+08	4.79778e+06	7.1	0
2					R1476	30800		77000000		93.7		234250		hg19	159374	153091	7779	254	3.2652	15.5722	45.7638	1.15179e+09	5.61602e+06	0	0
					R1500	24300	18700	53750000		59.5	54.9	143000		hg19	218699	209590	10076	317	3.14609	15.4348	46.2871	7.95067e+08	3.60621e+06	0	12.5
3					R9022	11300	39800	63875000		3650	6520	254250		hg19	299761	289748	19950	504	2.52632	17.0659	45.0417	1.05367e+09	4.83727e+06	0	5
					R9036	9630		24075000		3720		186000		hg19	212111	205128	13804	503	3.64387	17.0632	45.664	3.97271e+08	2.60702e+06	0	0
1	library positive control				R1429	902653	1.226e+06	2.66081e+09		Average № spike-in molecules in blanks per experiment set
					R1453	failed
2					R1477	866067	1.09489e+06	2.4512e+09		1		236638
					R9001	673294	605482	1.59847e+09		2		179323
3					R9023	874971	1.25924e+06	2.66776e+09		3		220125
					R9037	1.05577e+06	1.42774e+06	3.10439e+09
* Libraries were measured on qPCR plates according to experiment sets. Not all libraries could be measured in replicates because of space restrictions on the qPCR plates. All library positive controls were measured together on a separate qPCR plate to allow direct comparison of library preparation efficiencies across experiments.
† To calculaute the libray preparation efficiency based on the oligonucleotide spike-in, the № of spike-in molecules in a sample library was compared to the average in the blank libraries of the corresponding experiment set.
‡ Sample 2 was omitted from all analyses involving aligned sequences due to the small number of aligned sequences.
